# Supplementary figures and images for: A selective role for ventromedial subthalamic nucleus in inhibitory control
Source: eLife journal article supplement (doi:10.7554/elife.31627), 2017-12-04

**A**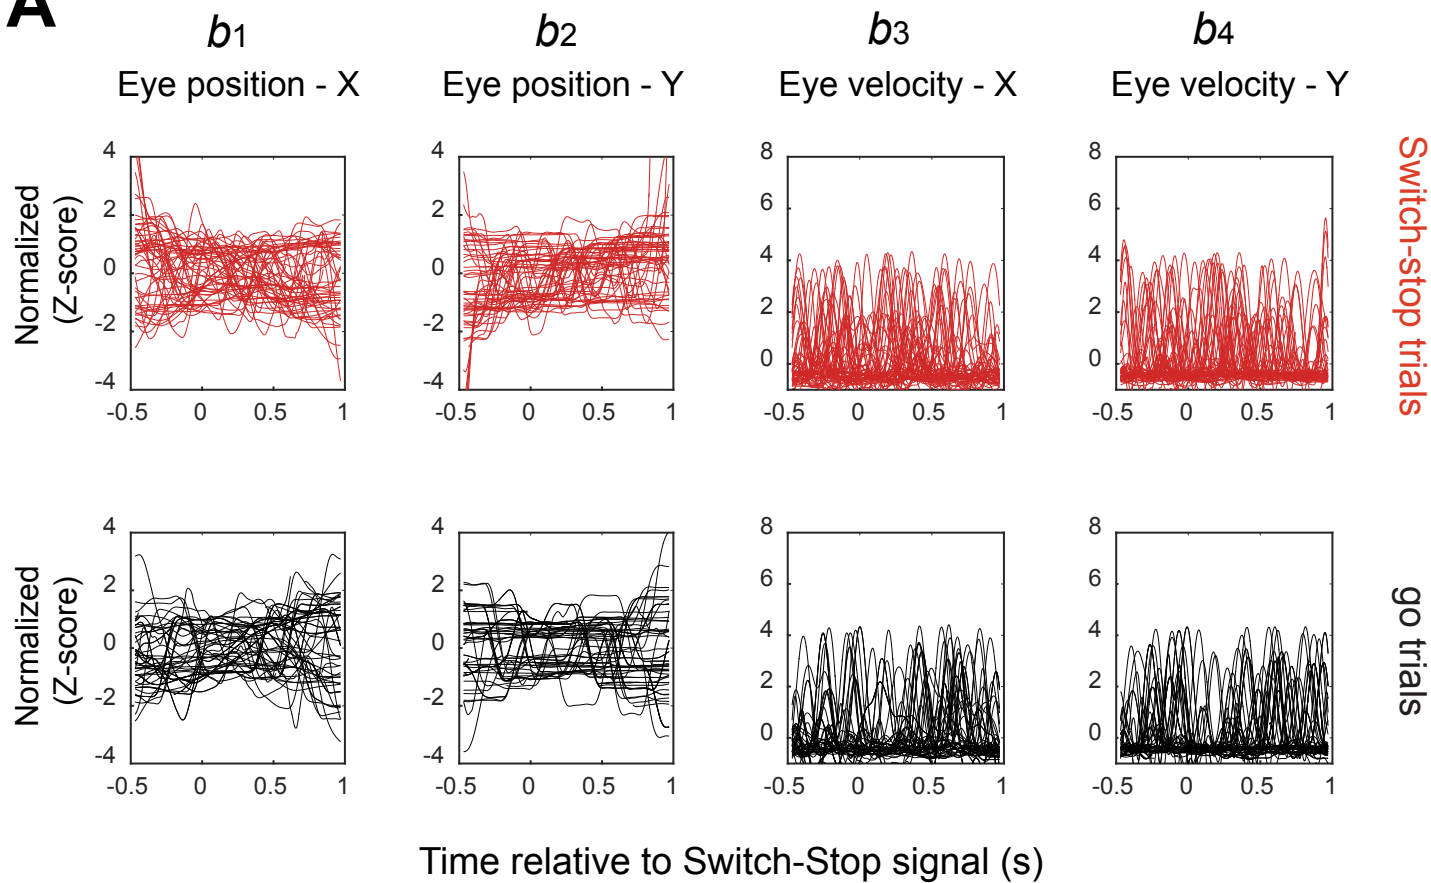**B**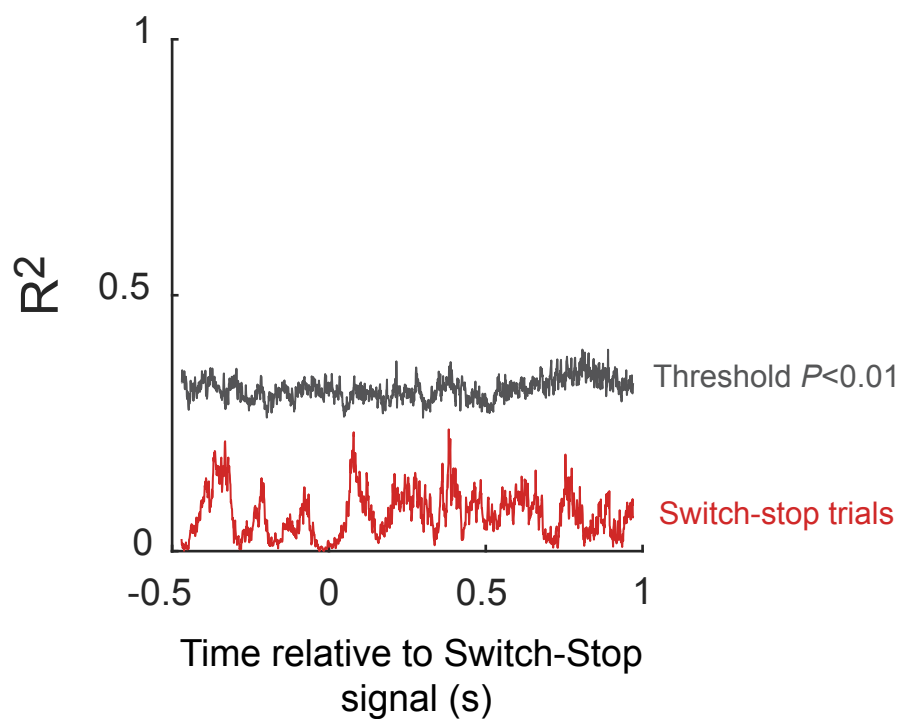

Supplement: supp [file elife-31627-supp-v1.zip]

### A Example of Stop-failure cell

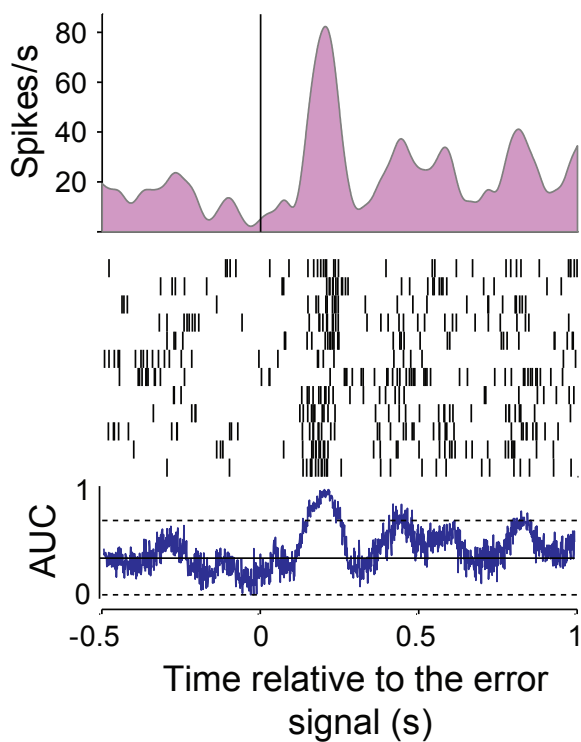

### B Example of Stop-success cell

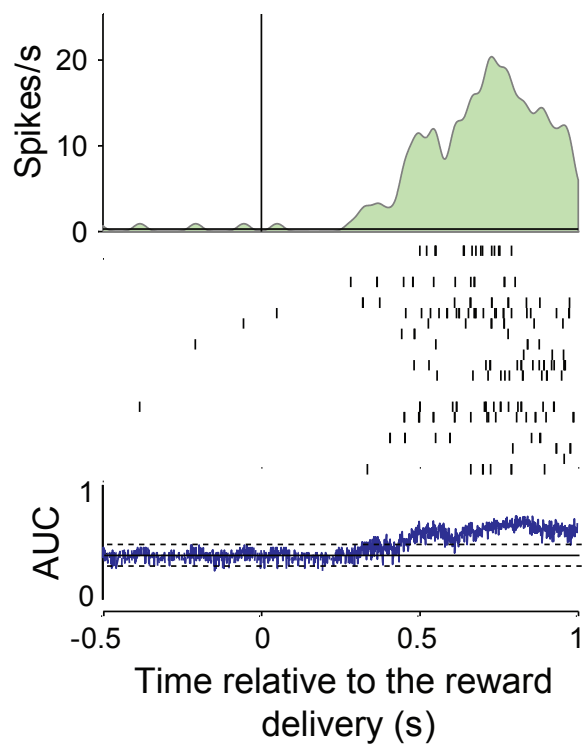

### C

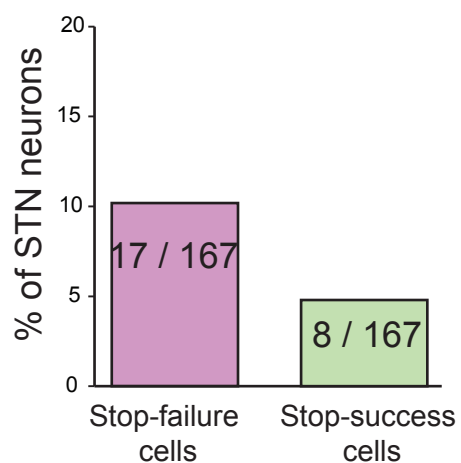

### D

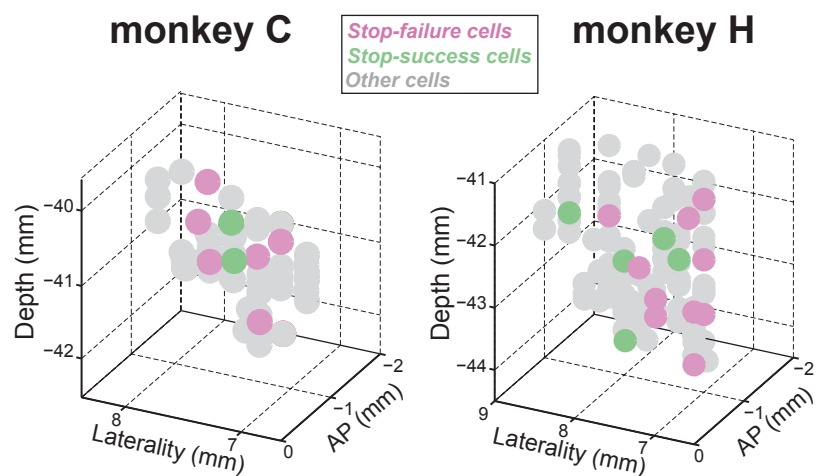

Supplement: supp [file elife-31627-supp-v1.zip]

## monkey C

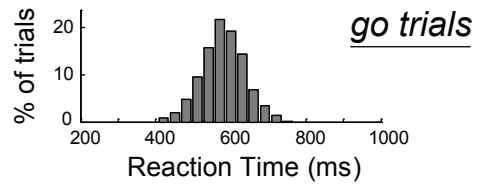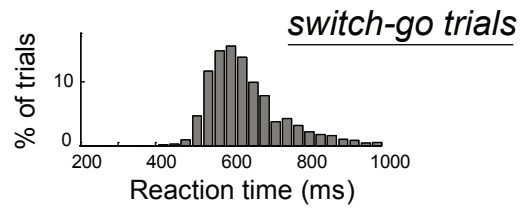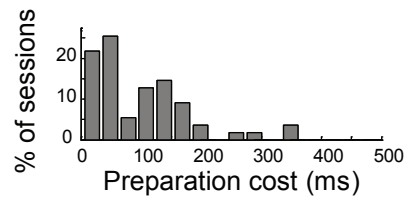

## monkey H

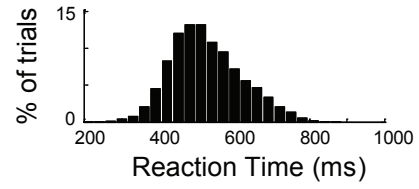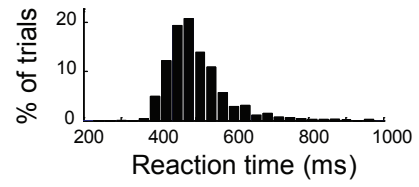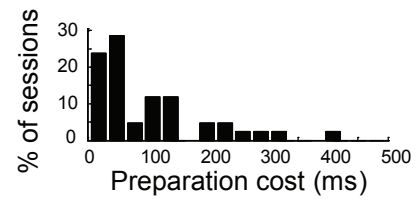

Supplement: supp [file elife-31627-supp-v1.zip]

**A****Go cells (n= 61)**switch-go trials  
no-go trials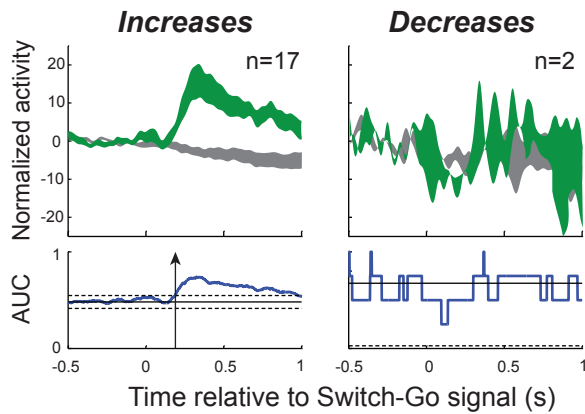**B****NoGo cells (n= 41)**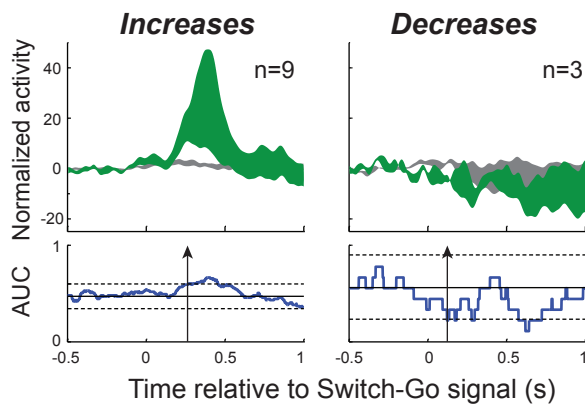**C**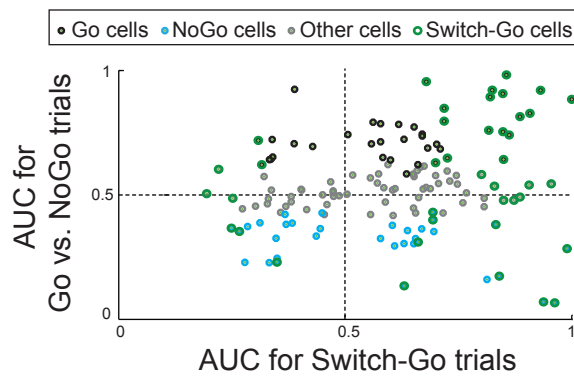

Supplement: supp [file elife-31627-supp-v1.zip]
